# Supplementary material for: Voice efficiency for different voice qualities combining experimentally derived sound signals and numerical modeling of the vocal tract
Source: Frontiers journal article supplement (doi:10.3389/fphys.2022.1081622), 2022-12-23
Supplement: Data_Sheet_1.ZIP [file Data_Sheet_1.ZIP]

## Sheet: Data
Voice quality, vowel	Pitch	fR1 kHz	fR2 kHz	fR3 kHz	fR4 kHz	fR5 kHz	LR1 kHz	LR2 kHz	LR3 kHz	LR4 kHz	LR5 kHz	EGG slope dB/oct	R2	vgsound slope dB/oct	R2	I dB W/m2	P dB	Inorm dB W/m2	Pnorm dB	Ic		VV mm3	SP mm3	ET mm3	HPl mm3	HPu mm3	OPr mm3	OPf mm3	V mm3	OP/HP	VT Length mm			Leq dB	Leqnorm dB		Hlg-IIR RMS error Pa/(m/s)	Hgg-IIR RMS error Pa/Pa		F1 kHz, (inverse filtering)	F1-time stamp sec, (inverse filtering)
Subject-1-Belting-a	Ab4	0.95	1.51	3.15	6.6	9.52	21.7	20.56	18.46	25.67	17.84	-10.32	0.98	-5.94	0.84	2.5	-89.5	12.8	-79.2	0.49		165.58	1398.53	265.24	2132.76	4133	5336.24	56140.9	69572.2	7.59	114.81			84.73	89.87		0.2	47.46		1.071	0.272
Subject-1-Twang-Oral-a	Ab4	0.87	1.47	2.91	3.53	4.74	20.64	20.23	11.06	6.64	21.51	-9.6	0.96	-6.06	0.51	-17.1	-108.1	12.3	-78.6	0.35		154.18	1170.98	765.12	3232.41	2421.94	3520.87	49114.2	60379.8	6.8	122.06			75.74	90.45		2.57	31.25		0.719	0.371
Subject-1-Opera-a	Ab4	0.39	0.98	3.01	3.77	4.76	13.18	10.53	2.27	18.12	4.09	-11.78	0.99	-8.79	0.76	-1	-92.8	21.2	-70.6	0.32		135.57	2439.43	950.52	7188.09	5755.14	3682.09	18704.9	38855.7	1.36	165.83			80.02	91.15		1.65	189.27		0.395	0.222
Subject-1-Sobbing-a	Ab4	0.35	1.09	3.31	4.09	5.18	12.91	7.66	12.5	-0.91	17.74	-10.99	0.99	-13.92	0.85	-6.5	-93.4	25.5	-61.4	0.35		279.62	2450.42	1131.49	10467.5	5776.58	2517.77	22501	45124.4	1.24	153.08			75.34	91.35		0.68	417.06		0.582	0.679
Subject-1-Speech-a	Ab4	0.67	1.51	2.76	3.64	4.93	15.26	14.13	3.75	6.94	14.34	-10.79	0.99	-7.08	0.7	13.2	-80.6	20	-73.8	0.35		160.06	1306.63	666.92	3222.72	1510.57	640.38	29388.7	36895.9	4.37	119.77			87.07	90.46		0.16	152.44		0.857	0.406
Subject-1-Falsetto-a	Ab4	0.59	1.25	2.37	3.42	4.32	15.33	14.99	-6.84	10.17	12.97	-15.94	0.99	-18.93	0.96	-15.8	-103.8	13.5	-74.5	0.2		227.52	1527.55	1040.05	3989.97	2133.99	2081.43	21552.5	32553	2.65	126.76			76.74	91.37		8.1	124.77		0.676	0.53
Subject-1-Belting-i	Ab4	0.41	2.31	3.04	4.12	5.13	13.39	13.66	18.16	11.49	21.72	-10.37	0.99	-5.97	0.53	2.3	-87	14.8	-74.4	0.56		150.29	2006.52	788.74	9317.37	9757.13	1484.32	27976.3	51480.6	1.34	137.35			82.72	89.01		1.63	143.77		0.448	0.695
Subject-1-Twang-Oral-i	Ab4	0.36	2.41	3.07	3.79	5.03	11.2	8.88	6.73	13.08	19.26	-10.77	0.99	-4.39	0.17	0.1	-86.5	28.6	-58	0.39		195.76	1586.87	808.4	8636.13	5960.23	1304.77	23343.2	41835.3	1.43	134.12			77.13	91.39		1.04	109.04		0.417	0.623
Subject-1-Opera-i	Ab4	0.38	1.9	2.84	4.2	5.66	13.46	10.32	16.66	17.57	18.95	-10.01	0.99	-7.69	0.59	3.6	-87.4	20.1	-71	0.39		190.48	2330.79	690.5	9178.62	12419.8	1900.84	23066.1	49777.2	1.01	156.54			83.2	91.42		0.45	28.27		0.395	0.505
Subject-1-Sobbing-i	Ab4	0.38	1.71	2.75	3.3	4.01	13.77	9.45	12.43	7.46	4.16	-12.5	1	-8.99	0.63	5.8	-89.4	33.4	-61.8	0.31		95.94	2661.21	795.77	12355.8	12911.6	2138.37	13510.3	44469	0.54	147.97			77.31	91.09		0.11	139.19		0.42	0.64
Subject-1-Speech-i	Ab4	0.36	2.12	3.04	3.7	4.3	10.57	6.73	5.69	9.77	9.5	-9.58	0.99	-3.4	0.14	12.8	-81.9	25.3	-69.5	0.4		110.22	1589.64	673.54	6896.27	5641.54	1523.03	9728.83	26163.1	0.75	133.08			84.64	90.89		1.02	264.19		0.42	0.375
Subject-1-Falsetto-i	Ab4	0.37	1.91	2.89	3.73	4.99	11.53	8.99	10.65	11.38	17.71	-13.03	0.99	-17.57	0.96	9.2	-85.8	30.9	-64	0.23		179.69	1919.66	708.1	8288.6	6975.11	2684.13	9029.29	29784.6	0.65	139.59			80.66	91.54		1.39	174.82		0.29	0.559
Subject-1-Belting-a	Ab3	0.65	1.44	2.54	4.51	6.73	15.62	17.38	10.42	17.46	22.92	-9.01	0.99	-3.02	0.28	0.7	-90.7	26.7	-64.7	0.62		112.66	1432.7	740.47	2220.84	2385.23	1852.17	31905.9	40649.9	4.9	115.03			77.21	90.18		0.16	103.53		0.971	0.105
Subject-1-Twang-Oral-a	Ab3	0.63	1.44	3.04	3.84	4.75	16.09	16.08	9.55	7.78	4.58	-8.61	1	-20.18	0.95	-19.9	-116.1	30.9	-65.3	0.51		132.41	2026.31	666.9	4463.08	3089.26	1970.56	24015.1	36363.6	2.5	126.8			66.17	91.6		0.05	42.42		0.625	0.176
Subject-1-Opera-a	Ab3	0.44	1.14	3.06	3.93	4.51	14.73	11.67	6.02	16.05	15.28	-9.13	0.99	-12.33	0.99	-24	-115.8	19.9	-71.9	0.45		266.8	3148.25	672.87	8684.72	6493.76	4282.44	22395.1	45943.9	1.38	156.88			69.41	91.37		0.76	86.35		0.47	0.306
Subject-1-Sobbing-a	Ab3	0.31	1.06	2.83	3.43	3.8	14.12	6.94	5.47	1.54	0.53	-8.91	0.99	-15.72	0.98	-25.7	-118.2	26.6	-65.9	0.38		653.85	4625.94	1199.47	18142.7	16118.6	3970.72	20351.9	65063.1	0.6	166.98			65.66	91.8		0.31	75.85		0.516	0.484
Subject-1-Speech-a	Ab3	0.66	1.39	2.66	3.47	4.51	16	17.32	4.43	-5.81	14.78	-8.94	1	-12.2	0.82	-12.8	-100.9	5.4	-82.7	0.56		200.17	1683.07	522.61	3541.12	2459	1910.45	22945.9	33262.3	2.96	128.82			81.85	90.98		1.8	63.65		0.776	0.386
Subject-1-Falsetto-a	Ab3	0.5	1.34	3.05	3.7	4.17	16.96	12.12	7.71	11.8	12.54	-10.27	0.99	-11.71	0.74	-42.7	-127.3	11.3	-73.3	0.32		416.02	3793.39	1333.78	11855.3	8502	2787.14	32411.3	61098.9	1.36	141.38			64.99	91.97		1.3	365.75		0.32	0.229
