# Supplementary figures and images for: Voice efficiency for different voice qualities combining experimentally derived sound signals and numerical modeling of the vocal tract
Source: Frontiers journal article supplement (doi:10.3389/fphys.2022.1081622), 2022-12-23

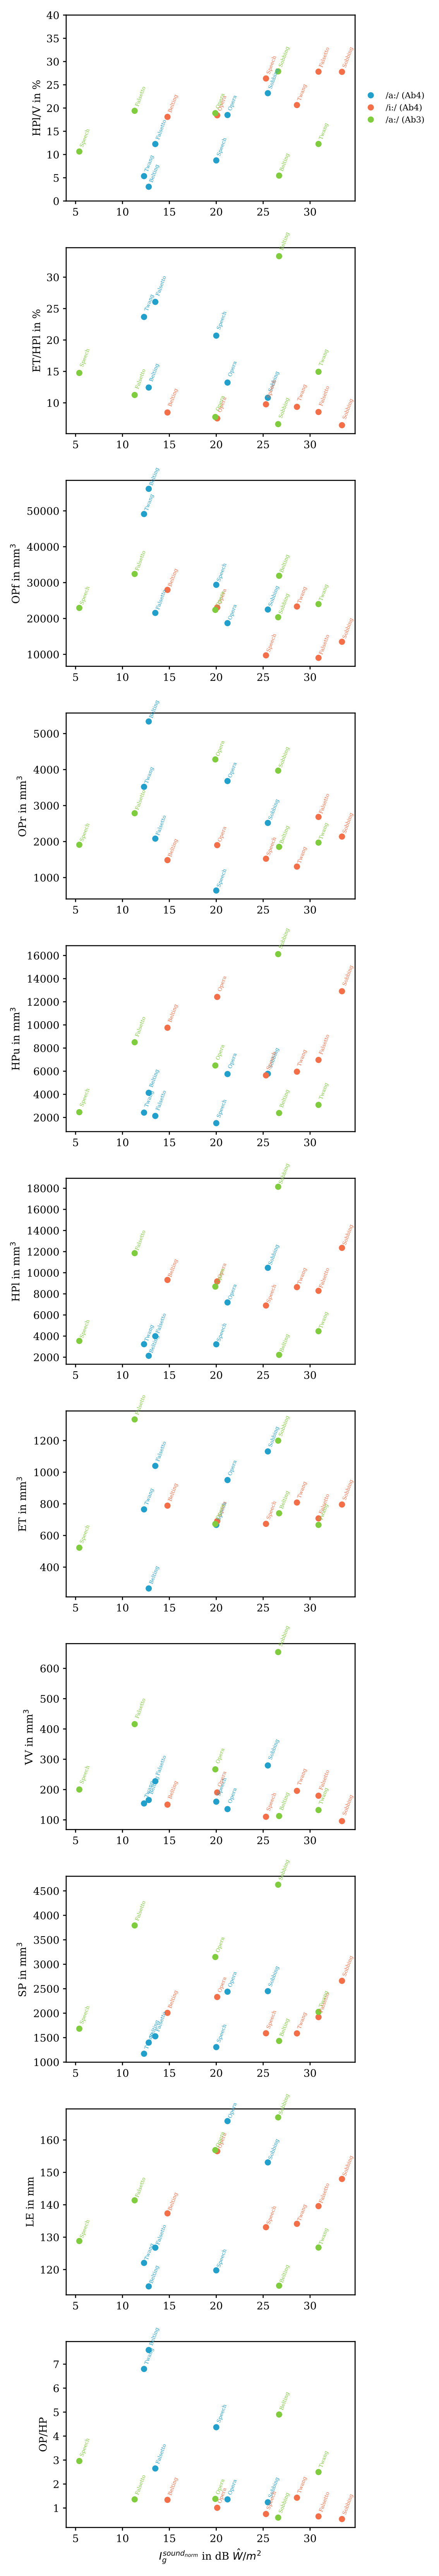

Supplement: Data_Sheet_1.ZIP [file Data_Sheet_1.ZIP]

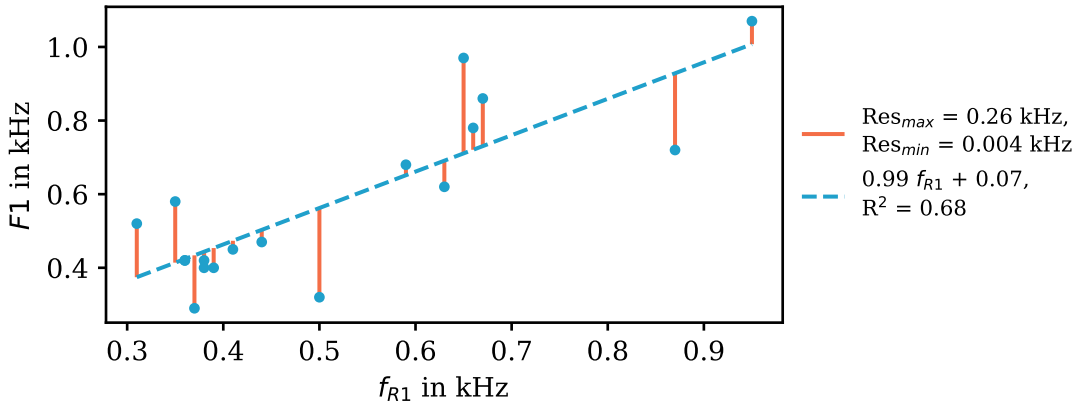

Supplement: Data_Sheet_1.ZIP [file Data_Sheet_1.ZIP]
